# Supplementary material for: A dual photocarrier separation channel in CdS/ZnS for outstanding photocatalytic hydrogen evolution
Source: Royal Society of Chemistry journal article supplement (doi:10.1039/d4nj01184h), 2024-01-01
Supplement: d4nj01184h1.pdf [file d4nj01184h1.pdf]

# Supporting Information

## Dual photocarrier separation channel in CdS/ZnS for outstanding photocatalytic hydrogen evolution

Yi Zheng,<sup>\*a</sup> Qiaoling Chen,<sup>a</sup> Wenjing Zhang,<sup>a</sup> Chongwen Zhang,<sup>a</sup> Rong Ma,<sup>a</sup> Chunlei Li,<sup>\*a</sup> and Jing Zhang<sup>\*b,c</sup>

### Supporting Figures and Table

Table S1. Cd and Zn Contents of Prepared Samples Based on ICP-OES Results

| Sample                                           | Cd (wt%) | Zn (wt%) | S (wt%) | CdS:CdS/ZnS weight ratio |
|--------------------------------------------------|----------|----------|---------|--------------------------|
| CZS-1                                            | 78.26    | 3.03     | 18.24   | 0.96                     |
| CZS-2                                            | 28.22    | 45.65    | 26.4    | 0.38                     |
| CZS-3                                            | 27.72    | 50.79    | 20.67   | 0.35                     |
| CZS-2' (No Na <sub>2</sub> S solution was added) | 79.14    | 0.96     | 18.29   | 0.98                     |

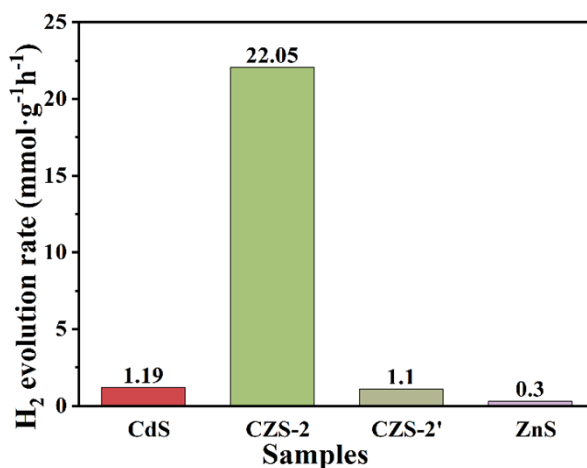

Fig.S1. Photocatalytic performance of the prepared samples

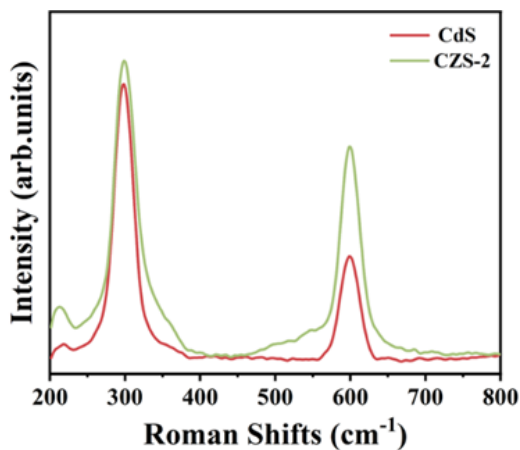

Fig.S2. Raman spectra of the CdS nanocrystals and CZS-2

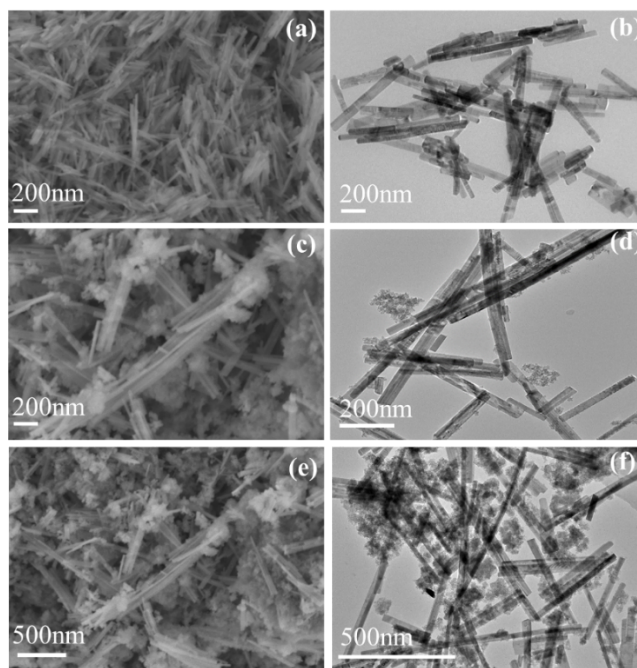

Fig.S3.(a) SEM and (b) TEM images of CdS nanorods , (c) ,(e) SEM and (d) , (f)TEM images of CdS/ZnS(CZS-2).

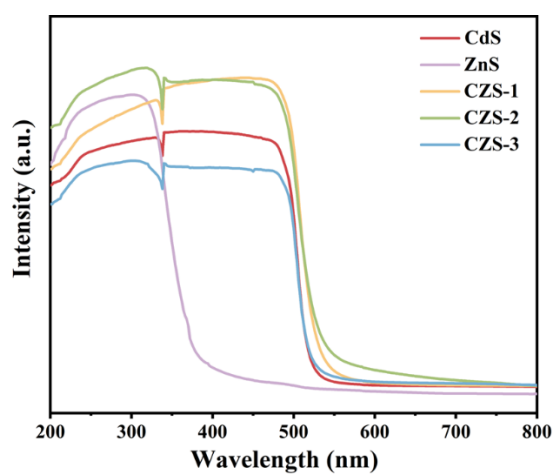

Fig.S4. UV-vis diffuse reflectance spectra of CdS, ZnS and CZS-X nanocomposites.

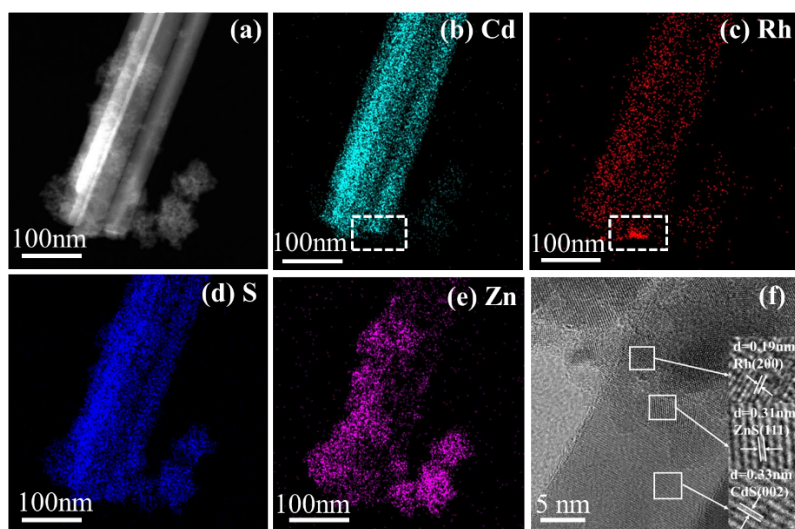

Fig.S5. (a,b,c,d,e) elemental mapping images and HRTEM images (f) of CdS/ZnS/Rh.

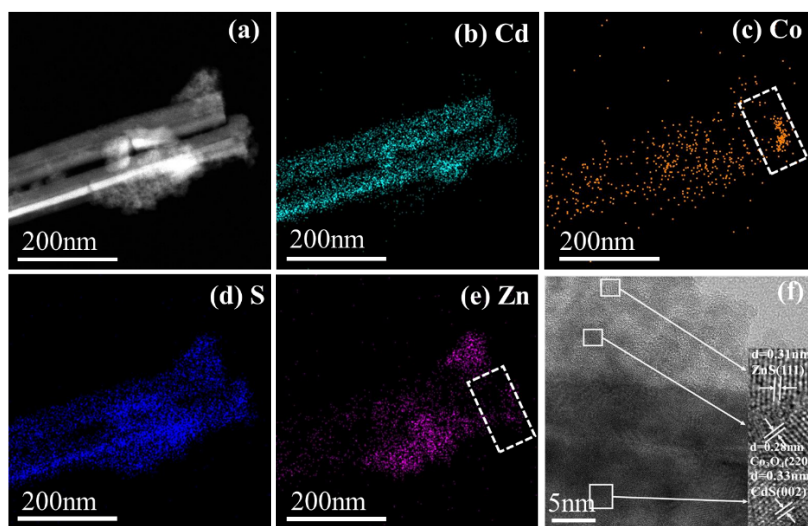

Fig.S6. (a,b,c,d,e) elemental mapping images and HRTEM images (f) of CdS/ZnS/Co<sub>3</sub>O<sub>4</sub>

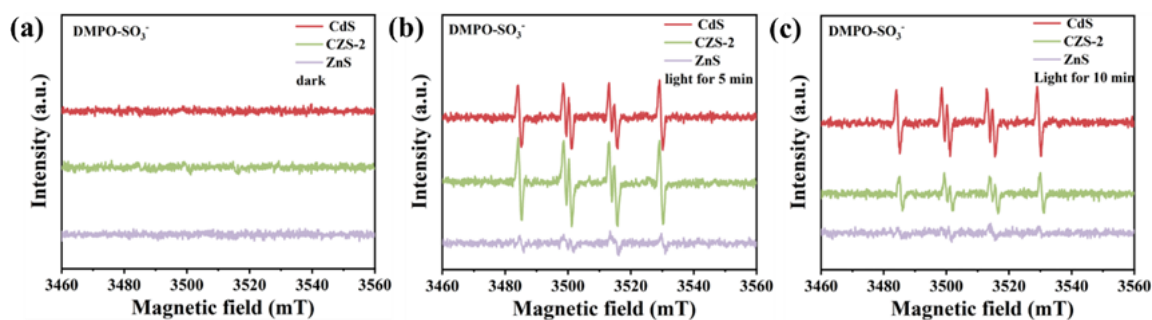

Fig.S7. ESR spectra of CdS, ZnS, CZS-2 samples (a) at dark and (b) light for 5 min, (c) light for 10 min

Table S2. Comparison of the photocatalytic H<sub>2</sub> evolution rates over CdS/ZnS based photocatalysts

| Catalyst system | Sacrificial agent                                             | RH <sub>2</sub> (Evolution rate) | AQY(%) | light source     | Reference |
|-----------------|---------------------------------------------------------------|----------------------------------|--------|------------------|-----------|
| CdS/ZnS         | 0.35M Na <sub>2</sub> S 0.25M Na <sub>2</sub> SO <sub>3</sub> | 1102.5 μmol h <sup>-1</sup>      | 4.68   | 300 w xenon lamp | This work |
|                 |                                                               |                                  | 3.76   | 300 w xenon lamp | 24        |
| CdS/ZnS         | 0.35M Na <sub>2</sub> S 0.25M Na <sub>2</sub> SO <sub>3</sub> | 140.2 umol h <sup>-1</sup>       |        | lamp λ >400nm    |           |

|         |                                                               |                             |       |                                        |    |
|---------|---------------------------------------------------------------|-----------------------------|-------|----------------------------------------|----|
| CdS/ZnS | 0.35M Na <sub>2</sub> S 0.25M Na <sub>2</sub> SO <sub>3</sub> | 233.15 μmol h <sup>-1</sup> | 9.5   | 300 w xenon lamp λ >420nm              | 42 |
| CdS/ZnS | 0.5 M Na <sub>2</sub> S-Na <sub>2</sub> SO <sub>3</sub>       | 94.05 μmol h <sup>-1</sup>  | --    | 300 w xenon lamp λ >420nm              | 44 |
| CdS/ZnS | 0.5M Na <sub>2</sub> S 0.5M Na <sub>2</sub> SO <sub>3</sub>   | 241 μmol h <sup>-1</sup>    | 9.3   | 300 w xenon lamp AM1.5G                | 53 |
| CdS/ZnS | 0.35M Na <sub>2</sub> S 0.25M Na <sub>2</sub> SO <sub>3</sub> | 726 μmol h <sup>-1</sup>    | 50.61 | 225 w xenon lamp λ >380nm              | 65 |
| CdS/ZnS | 0.1 M Na <sub>2</sub> S-Na <sub>2</sub> SO <sub>4</sub>       | 3430 μmol h <sup>-1</sup>   | --    | Solar light India (14.57° N, 78.83° E) | 69 |

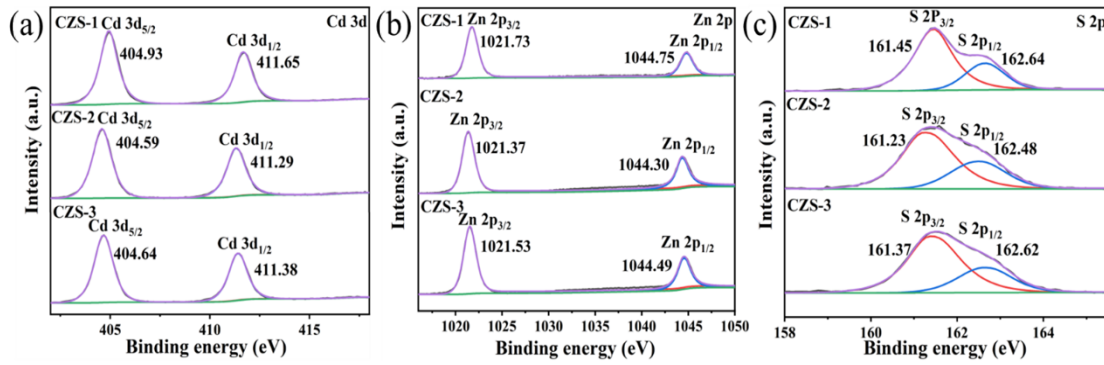

Fig. S8. high-resolution XPS spectra of (a) Cd 3d, (b) Zn 2p and (c) S 2p of the CZS-1, CZS-2 and CZS-3 sample.

AQY is calculated as follows:

$$AQY = \frac{2 \times \nu \times N_A}{I S \lambda / h c}$$

$$= \frac{2 \times 6.022 \times 10^{-23} \times \left(5.09 \times \frac{10^{-4}}{3600}\right)}{0.061 \times 28.26 \times \frac{420}{6.626 \times 10^{-34} \times 3 \times 10^8}} = 4.68\%$$

where  $\nu$  is the H<sub>2</sub> rate (mol s<sup>-1</sup>),  $N_A$  is Avogadro's constant (mol<sup>-1</sup>),  $I$  is the light intensity (W cm<sup>-2</sup>),  $S$  is the irradiation area (cm<sup>2</sup>),  $\lambda$  is the wavelength of incident light (nm),  $h$  is the Planck constant (J s) and  $c$  is the speed of light (nm s<sup>-1</sup>).

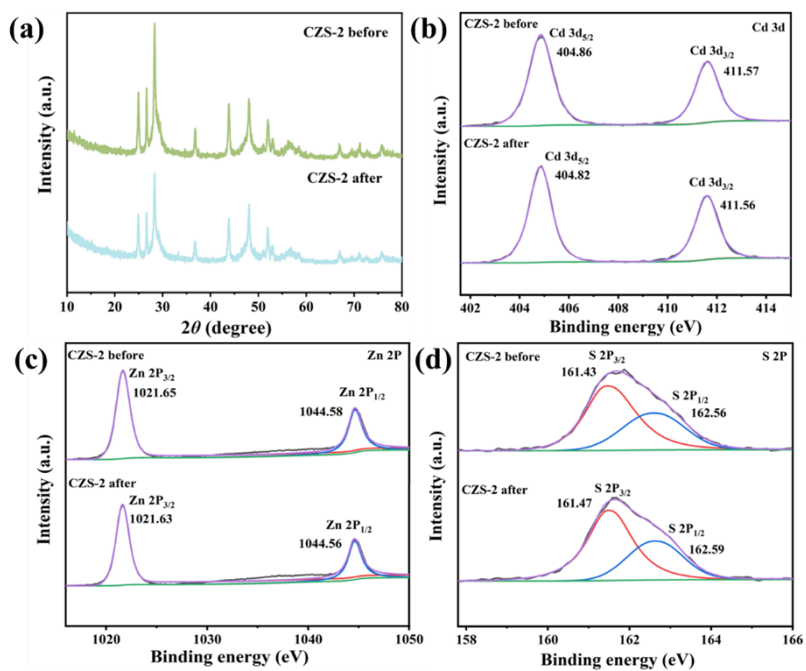

Fig.S9.(a) XRD and high-resolution XPS spectra of (b) Cd 3d, (c) Zn 2p and (d) S 2p of the CZS-2 sample before and after cycling measurements.

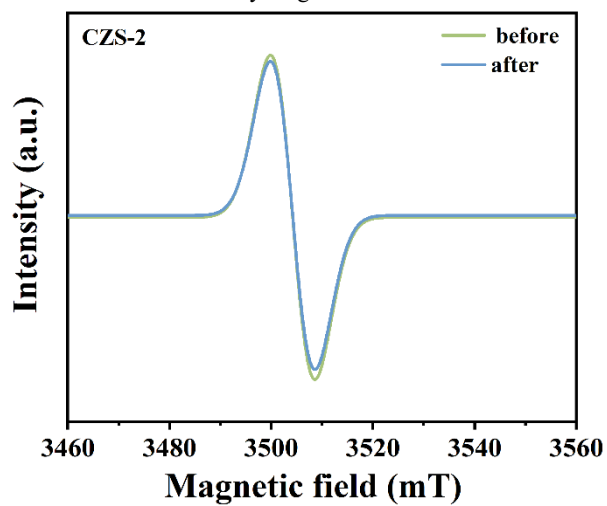

Fig.S10 EPR spectra of CZS-2 before and after the reaction
